# Supplementary material
Source: PubMed Central journal article supplement (PMC8524352)
Supplement: jamaneurol-e213723-s001.pdf [file jamaneurol-e213723-s001.pdf]

## Supplemental Online Content

Chalak LF, Pappas A, Tan S, et al; the Eunice Kennedy Shriver National Institute of Child Health and Human Development Neonatal Research Network. Association between increased seizures during rewarming after hypothermia for neonatal hypoxic ischemic encephalopathy and abnormal neurodevelopmental outcomes at 2-year follow-up: a nested multisite cohort study. *JAMA Neurol*. Published online October 18, 2021. doi:10.1001/jamaneurol.2021.3723

**eTable.** Characteristics of SMART vs the Optimizing Cooling (OC) trial not in SMART

This supplemental material has been provided by the authors to give readers additional information about their work.

**eTable. Characteristics of SMART vs the Optimizing Cooling trial (OC) not in SMART**

| <b>2a. Maternal Characteristics</b> | <b>Enrolled infants in SMART (n=120)</b> | <b>Infants not enrolled in SMART (N=244)</b> | <b>Total Optimizing trial participants (n=364)</b> | <b>P-value</b>    |
|-------------------------------------|------------------------------------------|----------------------------------------------|----------------------------------------------------|-------------------|
| Race                                |                                          |                                              |                                                    |                   |
| Black                               | 27 (23%)                                 | 87 (36%)                                     | 114 (32%)                                          | <b>0.046</b>      |
| White                               | 81 (69%)                                 | 138 (57%)                                    | 219 (61%)                                          |                   |
| Other                               | 9 (8%)                                   | 16 (7%)                                      | 25 (7%)                                            |                   |
| Maternal age, Mean (SD), yr         | 28.4 ± 6.81                              | 27.7 ± 6.81                                  | 27.9 ± 6.81                                        | 0.36              |
| Married                             | 62 (52%)                                 | 124 (51%)                                    | 186 (52%)                                          | 0.97              |
| Gravida, median (IQR)               | 2 (1-3)                                  | 2 (1-3)                                      | 2 (1-3)                                            | 0.80 <sup>†</sup> |
| Parity, median (IQR)                | 1.5 (1-3)                                | 1 (1-3)                                      | 1 (1-3)                                            | 0.18 <sup>†</sup> |
| Pregnancy complications             |                                          |                                              |                                                    |                   |
| Chronic hypertension                | 25 (21%)                                 | 48 (20%)                                     | 73 (20%)                                           | 0.78              |
| Antepartum hemorrhage               | 13 (11%)                                 | 27 (11%)                                     | 40 (11%)                                           | 0.98              |
| Thyroid dysfunction                 | 5 (4%)                                   | 9 (4%)                                       | 14 (4%)                                            | 0.78*             |
| Diabetes                            | 12 (10%)                                 | 34 (14%)                                     | 46 (13%)                                           | 0.29              |
| Intrapartum complications           |                                          |                                              |                                                    |                   |
| Fetal decelerations                 | 95 (81%)                                 | 187 (77%)                                    | 282 (78%)                                          | 0.48              |
| Cord problem                        | 25 (21%)                                 | 24 (10%)                                     | 49 (13%)                                           | <b>0.004</b>      |
| Uterine rupture                     | 6 (5%)                                   | 16 (7%)                                      | 22 (6%)                                            | 0.56              |
| Maternal pyrexia (≥37.6C)           | 13 (11%)                                 | 28 (12%)                                     | 41 (11%)                                           | 0.87              |
| Shoulder dystocia                   | 11 (9%)                                  | 18 (7%)                                      | 29 (8%)                                            | 0.55              |
| Maternal hemorrhage                 | 17 (14%)                                 | 38 (16%)                                     | 55 (15%)                                           | 0.72              |
| Rupture of membranes (≥ 18h)        | 12 (10%)                                 | 26 (11%)                                     | 38 (11%)                                           | 0.87              |
| Emergency cesarean delivery         | 75 (63%)                                 | 156 (64%)                                    | 231 (63%)                                          | 0.79              |

| <b>2b. Neonatal Characteristics</b> | <b>SMART cohort (n=120)</b> | <b>Infants not enrolled in SMART (N=244)</b> | <b>Optimizing Cooling trial participants (n=364)</b> | <b>P value</b> |
|-------------------------------------|-----------------------------|----------------------------------------------|------------------------------------------------------|----------------|
| Age at randomization, Mean (SD), h  | 4.94 ± 1.49                 | 4.91 ± 1.09                                  | 4.92 ± 1.23                                          | 0.44           |
| Outborn                             | 78 (65%)                    | 156 (64%)                                    | 234 (64%)                                            | 0.84           |
| Male                                | 70 (58%)                    | 142 (58%)                                    | 212 (58%)                                            | 0.98           |
| Apgar score ≤ 5                     |                             |                                              |                                                      |                |
| 5 minute                            | 101 (86%)                   | 205 (84%)                                    | 306 (85%)                                            | 0.76           |
| 10 minute                           | 71 (68%)                    | 152 (69%)                                    | 223 (69%)                                            | 0.88           |
| Birthweight, Mean (SD), g           | 3384 ± 549                  | 3347 ± 623                                   | 3359 ± 599                                           | 0.57           |
| Length, Mean (SD), cm               | 50.8 ± 3.10                 | 50.6 ± 2.98                                  | 50.7 ± 3.02                                          | 0.41           |

|                                                               |             |             |             |             |
|---------------------------------------------------------------|-------------|-------------|-------------|-------------|
| Head circumference, Mean (SD), cm                             | 34.0 ± 1.97 | 34.2 ± 1.73 | 34.1 ± 1.81 | 0.96        |
| Intubation in DR                                              | 88 (74%)    | 198 (81%)   | 286 (79%)   | 0.12        |
| Continued resuscitation 10 mins                               | 101 (85%)   | 214 (88%)   | 315 (87%)   | 0.40        |
| Time to spontaneous respirations >10 mins                     | 43 (39%)    | 107 (47%)   | 150 (44%)   | 0.17        |
| Cord blood, Mean (SD)                                         |             |             |             |             |
| pH                                                            | 6.95 ± 0.20 | 6.95 ± 0.18 | 6.95 ± 0.19 | 0.67        |
| Base deficit                                                  | 16.4 ± 7.07 | 15.9 ± 7.37 | 16.0 ± 7.27 | 0.63        |
| Seizures                                                      | 33 (28%)    | 72 (30%)    | 105 (29%)   | 0.69        |
| Encephalopathy                                                |             |             |             | <b>0.04</b> |
| Moderate                                                      | 100 (83%)   | 180 (74%)   | 280 (77%)   |             |
| Severe                                                        | 20 (17%)    | 64 (26%)    | 84 (23%)    |             |
| Inotropic support- prior to baseline                          | 23 (19%)    | 56 (24%)    | 79 (22%)    | 0.36        |
| Anticonvulsants- prior to baseline enrollment <6 hrs of birth | 30 (26%)    | 55 (24%)    | 85 (24%)    | 0.63        |

| <b>2c. Hospital course</b> | <b>SMART<br/>(n=120)</b> | <b>Not in SMART<br/>(N=244)</b> | <b>Optimizing trial participants<br/>(n=364)</b> | <b>P value</b> |
|----------------------------|--------------------------|---------------------------------|--------------------------------------------------|----------------|
| During cooling             |                          |                                 |                                                  |                |
| Arrhythmia                 | 1 (1%)                   | 9 (4%)                          | 10 (3%)                                          | 0.18*          |
| Acidosis >3 hr             | 2 (2%)                   | 5 (2%)                          | 7 (2%)                                           | 1.00*          |
| Major bleeding             | 2 (2%)                   | 5 (2%)                          | 7 (2%)                                           | 1.00*          |
| Death during cooling       | 0 (0%)                   | 13 (5%)                         | 13 (4%)                                          | <b>0.006*</b>  |
| Skin changes               | 2 (2%)                   | 14 (6%)                         | 16 (4%)                                          | 0.07           |
| Thrombosis                 | 0 (0%)                   | 1 (0%)                          | 1 (0%)                                           | 1.00*          |
| Other SAE                  | 7 (6%)                   | 25 (10%)                        | 32 (9%)                                          | 0.16           |
| During hospitalization     |                          |                                 |                                                  |                |
| Hypotension                | 33 (28%)                 | 85 (35%)                        | 118 (33%)                                        | 0.15           |
| Inotropic support          | 50 (42%)                 | 132 (54%)                       | 182 (50%)                                        | <b>0.03</b>    |
| Blood transfusion          | 37 (31%)                 | 85 (35%)                        | 122 (34%)                                        | 0.45           |
| Platelet transfusion       | 28 (23%)                 | 80 (33%)                        | 108 (30%)                                        | 0.06           |
| PPHN                       | 23 (19%)                 | 84 (34%)                        | 107 (29%)                                        | <b>0.003</b>   |
| Inhaled nitric oxide use   | 23 (19%)                 | 82 (34%)                        | 105 (29%)                                        | <b>0.004</b>   |
| ECMO                       | 3 (3%)                   | 19 (8%)                         | 22 (6%)                                          | <b>0.047</b>   |
| Seizures                   | 61 (53%)                 | 125 (54%)                       | 186 (54%)                                        | 0.82           |
| Arrhythmia                 | 1 (1%)                   | 13 (5%)                         | 14 (4%)                                          | <b>0.04*</b>   |
| Oliguria                   | 30 (25%)                 | 65 (27%)                        | 95 (26%)                                         | 0.74           |
| Hepatic dysfunction        | 18 (15%)                 | 72 (30%)                        | 90 (25%)                                         | <b>0.003</b>   |

|                                           |              |              |              |              |
|-------------------------------------------|--------------|--------------|--------------|--------------|
| Infection                                 | 5 (4%)       | 8 (3%)       | 13 (4%)      | 0.77*        |
| DIC                                       | 12 (10%)     | 42 (17%)     | 54 (15%)     | 0.07         |
| Blood glucose <30 mg/dL                   | 15 (13%)     | 35 (14%)     | 50 (14%)     | 0.63         |
| Skin changes                              | 3 (3%)       | 25 (10%)     | 28 (8%)      | <b>0.009</b> |
| Days on oxygen, Mean (SD)                 | 7.27 ± 8.00  | 8.90 ± 9.65  | 8.36 ± 9.16  | 0.14         |
| Days on ventilator                        | 5.58 ± 7.21  | 6.71 ± 7.89  | 6.34 ± 7.68  | 0.11         |
| Gastrostomy                               | 9 (8%)       | 15 (6%)      | 24 (7%)      | 0.63         |
| Tracheostomy                              | 0 (0%)       | 4 (2%)       | 4 (1%)       | 0.31*        |
| Death during NICU stay                    | 11 (9%)      | 38 (16%)     | 49 (13%)     | 0.09         |
| <b>Status at discharge</b>                | <b>N=109</b> | <b>N=206</b> | <b>N=315</b> |              |
| Length of stay                            | 21.1 ± 12.9  | 26.1 ± 32.6  | 24.3 ± 27.5  | 0.47         |
| Home ventilation                          | 0 (0%)       | 0 (0%)       | 0 (0%)       | N/A          |
| Home oxygen                               | 5 (5%)       | 4 (2%)       | 9 (3%)       | 0.29*        |
| Gavage tube                               | 24 (22%)     | 36 (18%)     | 60 (19%)     | 0.35         |
| Anticonvulsant medication after discharge | 26 (24%)     | 45 (22%)     | 71 (23%)     | 0.72         |

P-values are from chi-square test or Kruskal-Wallis test unless otherwise noted. \* Fisher's exact test due to sparse data. † P-values from Median test. no. (%), unless otherwise specified
