# Supplementary material
Source: PubMed Central journal article supplement (PMC8524352)
Supplement: jamaneurol-e213723-s002.pdf [file jamaneurol-e213723-s002.pdf]

\*Indicates required information. Only first name, last name, and suffix will appear in PubMed.

| <b>*Group Name(s): Eunice Kennedy Shriver National Institute of Child Health and Human Development Neonatal Research Network</b> |                   |                              |                  |                                      |                                          |                                                         |                                                                                            |
|----------------------------------------------------------------------------------------------------------------------------------|-------------------|------------------------------|------------------|--------------------------------------|------------------------------------------|---------------------------------------------------------|--------------------------------------------------------------------------------------------|
| <b>*First Name and Middle Initial(s)</b>                                                                                         | <b>*Last Name</b> | <b>*Suffix (eg, Jr, III)</b> | Academic Degrees | Institution                          | Location (city, state/province, country) | Role or Contribution, eg, chair, principal investigator | Group (if more than 1 Group listed in the byline) and/or Subgroup (eg, Steering Committee) |
| Namasivayam                                                                                                                      | Ambalavanan       |                              | MD               | Division of Neonatology, University  | Birmingham, AL, USA                      | Co-Principal                                            |                                                                                            |
| Monica V.                                                                                                                        | Collins           |                              | RN BSN           | Division of Neonatology, University  | Birmingham, AL, USA                      | Research Coordinator                                    |                                                                                            |
| Shirley S.                                                                                                                       | Cosby             |                              | RN BSN           | Division of Neonatology, University  | Birmingham, AL, USA                      | Research Coordinator                                    |                                                                                            |
| Myriam                                                                                                                           | Peralta-          |                              | MD MPH           | Division of Neonatology, University  | Birmingham, AL, USA                      | Follow-up Principal                                     |                                                                                            |
| Vivien A.                                                                                                                        | Phillips          |                              | RN BSN           | Division of Neonatology, University  | Birmingham, AL, USA                      | Follow-up                                               |                                                                                            |
| David A.                                                                                                                         | Randolph          |                              | MD PhD           | Division of Neonatology, University  | Birmingham, AL, USA                      | Site Investigator                                       |                                                                                            |
| Barbara                                                                                                                          | Alksninis         |                              | RNC PNP          | Department of Pediatrics, Women &    | Providence, RI, USA                      | Follow-up Examiner                                      |                                                                                            |
| Robert T.                                                                                                                        | Burke             |                              | MD MPH           | Department of Pediatrics, Women &    | Providence, RI, USA                      | Follow-up Examiner                                      |                                                                                            |
| Melinda                                                                                                                          | Caskey            |                              | MD               | Department of Pediatrics, Women &    | Providence, RI, USA                      | Follow-up Examiner                                      |                                                                                            |
| Nicholas                                                                                                                         | Guerina           |                              | MD PhD           | Department of Pediatrics, Women &    | Providence, RI, USA                      | Follow-up Examiner                                      |                                                                                            |
| Angelita M.                                                                                                                      | Hensman           |                              | PhD RNC-         | Department of Pediatrics, Women &    | Providence, RI, USA                      | Research Coordinator                                    |                                                                                            |
| Martin                                                                                                                           | Keszler           |                              | MD               | Department of Pediatrics, Women &    | Providence, RI, USA                      | Co-Principal                                            |                                                                                            |
| Mary Lenore                                                                                                                      | Keszler           |                              | MD               | Department of Pediatrics, Women &    | Providence, RI, USA                      | Follow-up Examiner                                      |                                                                                            |
| Andrea M.                                                                                                                        | Knoll             |                              |                  | Department of Pediatrics, Women &    | Providence, RI, USA                      | Data Entry                                              |                                                                                            |
| Emilee                                                                                                                           | Little            |                              | RN BSN           | Department of Pediatrics, Women &    | Providence, RI, USA                      | Research Nurse                                          |                                                                                            |
| Elizabeth C.                                                                                                                     | McGowan           |                              | MD               | Department of Pediatrics, Women &    | Providence, RI, USA                      | Follow-up Examiner                                      |                                                                                            |
| William                                                                                                                          | Oh                |                              | MD               | Department of Pediatrics, Women &    | Providence, RI, USA                      | Co-Principal                                            |                                                                                            |
| Birju A.                                                                                                                         | Shah              |                              | MD MPH           | Department of Pediatrics, Women &    | Providence, RI, USA                      | Follow-up Examiner                                      |                                                                                            |
| Ross                                                                                                                             | Sommers           |                              | MD               | Department of Pediatrics, Women &    | Providence, RI, USA                      | Follow-up Examiner                                      |                                                                                            |
| Elisa                                                                                                                            | Vieira            |                              | RN BSN           | Department of Pediatrics, Women &    | Providence, RI, USA                      | Research Nurse                                          |                                                                                            |
| Betty R.                                                                                                                         | Vohr              |                              | MD               | Department of Pediatrics, Women &    | Providence, RI, USA                      | Follow-up Principal                                     |                                                                                            |
| Stephanie                                                                                                                        | Guilford          |                              | BS               | Department of Pediatrics, University | Buffalo, NY, USA                         | Research Coordinator                                    |                                                                                            |
| Satyan                                                                                                                           | Lakshminrusimh    |                              | MD               | Department of Pediatrics, University | Buffalo, NY, USA                         | Co-Principal                                            |                                                                                            |
| Anne Marie                                                                                                                       | Reynolds          |                              | MD MPH           | Department of Pediatrics, University | Buffalo, NY, USA                         | Site Investigator                                       |                                                                                            |
| Michael G.                                                                                                                       | Sacilowski        |                              | MAT CCRC         | Department of Pediatrics, University | Buffalo, NY, USA                         | Follow-up                                               |                                                                                            |
| Ashley                                                                                                                           | Williams          |                              | MS Ed            | Department of Pediatrics, University | Buffalo, NY, USA                         | Research Coordinator                                    |                                                                                            |
| Karen                                                                                                                            | Wynn              |                              | RN               | Department of Pediatrics, University | Buffalo, NY, USA                         | Research Coordinator                                    |                                                                                            |
| Anna Maria                                                                                                                       | Hibbs             |                              | MD MSCE          | Department of Pediatrics, Rainbow    | Cleveland, OH, USA                       | Co-Principal                                            |                                                                                            |

## Supplemental Online Content: Nonauthor Collaborators

\*Indicates required information. Only first name, last name, and suffix will appear in PubMed.

| *First Name and Middle Initial(s) | *Last Name    | *Suffix (eg, Jr, III) | Academic Degrees | Institution                          | Location (city, state/province, country) | Role or Contribution, eg, chair, principal investigator | Group (if more than 1 Group listed in the byline) and/or Subgroup (eg, Steering Committee) |
|-----------------------------------|---------------|-----------------------|------------------|--------------------------------------|------------------------------------------|---------------------------------------------------------|--------------------------------------------------------------------------------------------|
| Nancy S.                          | Newman        |                       | RN               | Department of Pediatrics, Rainbow    | Cleveland, OH, USA                       | Research Coordinator                                    |                                                                                            |
| Bonnie S.                         | Siner         |                       | RN               | Department of Pediatrics, Rainbow    | Cleveland, OH, USA                       | Follow-up                                               |                                                                                            |
| Eileen K.                         | Stork         |                       | MD               | Department of Pediatrics, Rainbow    | Cleveland, OH, USA                       | Site Investigator                                       |                                                                                            |
| Michele C.                        | Walsh         |                       | MD MS            | Department of Pediatrics, Rainbow    | Cleveland, OH, USA                       | Co-Principal                                            |                                                                                            |
| Arlene                            | Zadell        |                       | RN BSN           | Department of Pediatrics, Rainbow    | Cleveland, OH, USA                       | Research Nurse                                          |                                                                                            |
| Michael S.                        | Caplan        |                       | MD               | Pritzker School of Medicine,         | Chicago, IL, USA                         | Steering Committee                                      |                                                                                            |
| Richard A.                        | Polin         |                       | MD               | Division of Neonatology, College of  | New York, NY, USA                        | Steering Committee                                      |                                                                                            |
| Sally S.                          | Adams         |                       | MS RN            | Department of Pediatrics, University | Dallas, TX, USA                          | Follow-up Examiner                                      |                                                                                            |
| Luc P.                            | Brion         |                       | MD               | Department of Pediatrics, University | Dallas, TX, USA                          | Co-Principal                                            |                                                                                            |
| Lijun                             | Chen          |                       | PhD RN           | Department of Pediatrics, University | Dallas, TX, USA                          | Research Coordinator                                    |                                                                                            |
| Alicia                            | Guzman        |                       |                  | Department of Pediatrics, University | Dallas, TX, USA                          | Research Coordinator                                    |                                                                                            |
| Elizabeth T.                      | Heyne         |                       | MS MA PA         | Department of Pediatrics, University | Dallas, TX, USA                          | Follow-up Examiner                                      |                                                                                            |
| Lizette E.                        | Lee           |                       | RN               | Department of Pediatrics, University | Dallas, TX, USA                          | Research Nurse                                          |                                                                                            |
| Linda A.                          | Madden        |                       | BSN RN           | Department of Pediatrics, University | Dallas, TX, USA                          | Follow-up Examiner                                      |                                                                                            |
| Emma                              | Ramon         |                       | RNC-NIC          | Department of Pediatrics, University | Dallas, TX, USA                          | Research Nurse                                          |                                                                                            |
| Pablo J.                          | Sánchez       |                       | MD               | Department of Pediatrics, University | Dallas, TX, USA                          | Principal Investigator                                  |                                                                                            |
| Catherine                         | Twell Boatman |                       | MS CIMI          | Department of Pediatrics, University | Dallas, TX, USA                          | Follow-up Examiner                                      |                                                                                            |
| Diana M.                          | Vasil         |                       | MSN RNC-         | Department of Pediatrics, University | Dallas, TX, USA                          | Research Coordinator                                    |                                                                                            |
| Myra H.                           | Wyckoff       |                       | MD               | Department of Pediatrics, University | Dallas, TX, USA                          | Principal Investigator                                  |                                                                                            |
| Patricia L.                       | Ashley        |                       | MD PhD           | Department of Pediatrics, Duke       | Durham, NC, USA                          | Follow-up Examiner                                      |                                                                                            |
| Joanne                            | Finkle        |                       | RN JD            | Department of Pediatrics, Duke       | Durham, NC, USA                          | Research Coordinator                                    |                                                                                            |
| Kimberley A.                      | Fisher        |                       | PhD FNP-         | Department of Pediatrics, Duke       | Durham, NC, USA                          | Research Coordinator                                    |                                                                                            |
| Ronald N.                         | Goldberg      |                       | MD               | Department of Pediatrics, Duke       | Durham, NC, USA                          | Principal Investigator                                  |                                                                                            |
| Ricki F.                          | Goldstein     |                       | MD               | Department of Pediatrics, Duke       | Durham, NC, USA                          | Follow-up Principal                                     |                                                                                            |
| Sandra                            | Grimes        |                       | RN BSN           | Department of Pediatrics, Duke       | Durham, NC, USA                          | Follow-up                                               |                                                                                            |
| Kathryn E.                        | Gustafson     |                       | PhD              | Department of Pediatrics, Duke       | Durham, NC, USA                          | Follow-up Examiner                                      |                                                                                            |
| William F.                        | Malcolm       |                       | MD               | Department of Pediatrics, Duke       | Durham, NC, USA                          | Follow-up Examiner                                      |                                                                                            |
| Ira                               | Adams-        |                       | MD MPH           | Department of Pediatrics, Emory      | Atlanta, GA, USA                         | Follow-up Principal                                     |                                                                                            |
| Diane I.                          | Bottcher      |                       | RN MSN           | Department of Pediatrics, Emory      | Atlanta, GA, USA                         | Research Nurse                                          |                                                                                            |
| David P.                          | Carlton       |                       | MD               | Department of Pediatrics, Emory      | Atlanta, GA, USA                         | Co-Principal                                            |                                                                                            |

## Supplemental Online Content: Nonauthor Collaborators

\*Indicates required information. Only first name, last name, and suffix will appear in PubMed.

| *First Name and Middle Initial(s) | *Last Name | *Suffix (eg, Jr, III) | Academic Degrees | Institution                          | Location (city, state/province, country) | Role or Contribution, eg, chair, principal investigator | Group (if more than 1 Group listed in the byline) and/or Subgroup (eg, Steering Committee) |
|-----------------------------------|------------|-----------------------|------------------|--------------------------------------|------------------------------------------|---------------------------------------------------------|--------------------------------------------------------------------------------------------|
| Sheena L.                         | Carter     |                       | PhD              | Department of Pediatrics, Emory      | Atlanta, GA, USA                         | Follow-up Examiner                                      |                                                                                            |
| Ellen C.                          | Hale       |                       | RN BS            | Department of Pediatrics, Emory      | Atlanta, GA, USA                         | Research Coordinator                                    |                                                                                            |
| Yvonne C.                         | Loggins    |                       | RN BSN           | Department of Pediatrics, Emory      | Atlanta, GA, USA                         | Research Coordinator                                    |                                                                                            |
| Colleen                           | Mackie     |                       | BS RT            | Department of Pediatrics, Emory      | Atlanta, GA, USA                         | Research Nurse                                          |                                                                                            |
| Ravi M.                           | Patel      |                       | MD MSc           | Department of Pediatrics, Emory      | Atlanta, GA, USA                         | Principal Investigator                                  |                                                                                            |
| Barbara J.                        | Stoll      |                       | MD               | Department of Pediatrics, Emory      | Atlanta, GA, USA                         | Principal Investigator                                  |                                                                                            |
| Lynn                              | Wineski    |                       | NNP              | Department of Pediatrics, Emory      | Atlanta, GA, USA                         | Follow-up Examiner                                      |                                                                                            |
| Susan                             | Gunn       |                       | NNP-BC           | Department of Pediatrics, Indiana    | Indianapolis, IN, USA                    | Research Nurse                                          |                                                                                            |
| Heidi M.                          | Harmon     |                       | MD MS            | Department of Pediatrics, Indiana    | Indianapolis, IN, USA                    | Follow-up Examiner                                      |                                                                                            |
| Dianne E.                         | Herron     |                       | RN CCRC          | Department of Pediatrics, Indiana    | Indianapolis, IN, USA                    | Research Coordinator                                    |                                                                                            |
| Abbey C.                          | Hines      |                       | PsyD             | Department of Pediatrics, Indiana    | Indianapolis, IN, USA                    | Follow-up Examiner                                      |                                                                                            |
| Jeffery                           | Joyce      |                       | CCRC             | Department of Pediatrics, Indiana    | Indianapolis, IN, USA                    | Follow-up Examiner                                      |                                                                                            |
| Carolyn                           | Lytle      |                       | MD MPH           | Department of Pediatrics, Indiana    | Indianapolis, IN, USA                    | Follow-up Examiner                                      |                                                                                            |
| Lucy C.                           | Miller     |                       | RN BSN           | Department of Pediatrics, Indiana    | Indianapolis, IN, USA                    | Research Coordinator                                    |                                                                                            |
| Heike M.                          | Minnich    |                       | PsyD HSP         | Department of Pediatrics, Indiana    | Indianapolis, IN, USA                    | Follow-up Examiner                                      |                                                                                            |
| Lu-Ann                            | Papile     |                       | MD               | Department of Pediatrics, Indiana    | Indianapolis, IN, USA                    | Follow-up Principal                                     |                                                                                            |
| Brenda B.                         | Poindexter |                       | MD MS            | Department of Pediatrics, Indiana    | Indianapolis, IN, USA                    | Principal Investigator                                  |                                                                                            |
| Leslie                            | Richard    |                       | RN               | Department of Pediatrics, Indiana    | Indianapolis, IN, USA                    | Follow-up                                               |                                                                                            |
| Lucy C.                           | Smiley     |                       | CCRC             | Department of Pediatrics, Indiana    | Indianapolis, IN, USA                    | Research Nurse                                          |                                                                                            |
| Leslie Dawn                       | Wilson     |                       | BSN CCRC         | Department of Pediatrics, Indiana    | Indianapolis, IN, USA                    | Research Coordinator                                    |                                                                                            |
| Michael J.                        | Acarregui  |                       | MD MBA           | Department of Pediatrics, University | Iowa City, IA, USA                       | Follow-up Principal                                     |                                                                                            |
| Vipinchandra                      | Bhavsar    |                       | MB BS            | Department of Pediatrics, University | Iowa City, IA, USA                       | Site Investigator                                       |                                                                                            |
| Jane E.                           | Brumbaugh  |                       | MD               | Department of Pediatrics, University | Iowa City, IA, USA                       | Follow-up Principal                                     |                                                                                            |
| Tarah T.                          | Colaizy    |                       | MD MPH           | Department of Pediatrics, University | Iowa City, IA, USA                       | Co-Principal                                            |                                                                                            |
| John M.                           | Dagle      |                       | MD PhD           | Department of Pediatrics, University | Iowa City, IA, USA                       | Study Investigator                                      |                                                                                            |
| Diane L.                          | Eastman    |                       | RN CPNP          | Department of Pediatrics, University | Iowa City, IA, USA                       | Follow-up                                               |                                                                                            |
| Heidi M.                          | Harmon     |                       | MD MS            | Department of Pediatrics, University | Iowa City, IA, USA                       | Follow-up Principal                                     |                                                                                            |
| Karen J.                          | Johnson    |                       | RN BSN           | Department of Pediatrics, University | Iowa City, IA, USA                       | Research Coordinator                                    |                                                                                            |
| Jonathan M.                       | Klein      |                       | MD               | Department of Pediatrics, University | Iowa City, IA, USA                       | Study Investigator                                      |                                                                                            |
| Julie B.                          | Lindower   |                       | MD MPH           | Department of Pediatrics, University | Iowa City, IA, USA                       | Site Investigator                                       |                                                                                            |

## Supplemental Online Content: Nonauthor Collaborators

\*Indicates required information. Only first name, last name, and suffix will appear in PubMed.

| *First Name and Middle Initial(s) | *Last Name | *Suffix (eg, Jr, III) | Academic Degrees | Institution                          | Location (city, state/province, country) | Role or Contribution, eg, chair, principal investigator | Group (if more than 1 Group listed in the byline) and/or Subgroup (eg, Steering Committee) |
|-----------------------------------|------------|-----------------------|------------------|--------------------------------------|------------------------------------------|---------------------------------------------------------|--------------------------------------------------------------------------------------------|
| Steven J.                         | McElroy    |                       | MD               | Department of Pediatrics, University | Iowa City, IA, USA                       | Site Investigator                                       |                                                                                            |
| Cary R.                           | Murphy     |                       | MD               | Department of Pediatrics, University | Iowa City, IA, USA                       | Site Investigator                                       |                                                                                            |
| Glenda K.                         | Rabe       |                       | MD MME           | Department of Pediatrics, University | Iowa City, IA, USA                       | Site Investigator                                       |                                                                                            |
| Robert D.                         | Roghair    |                       | MD               | Department of Pediatrics, University | Iowa City, IA, USA                       | Site Investigator                                       |                                                                                            |
| Jeffrey L.                        | Segar      |                       | MD               | Department of Pediatrics, University | Iowa City, IA, USA                       | Study Investigator                                      |                                                                                            |
| Jacky R.                          | Walker     |                       | RN               | Department of Pediatrics, University | Iowa City, IA, USA                       | Research Nurse                                          |                                                                                            |
| John A.                           | Widness    |                       | MD               | Department of Pediatrics, University | Iowa City, IA, USA                       | Co-Principal                                            |                                                                                            |
| Dan L.                            | Ellsbury   |                       | MD               | Center for Research, Education, and  | Des Moines, IA, USA                      | Site Investigator                                       |                                                                                            |
| Cheri                             | Gauldin    |                       | RN BSN           | Department of Pediatrics, Children's | Kansas City, MO, USA                     | Research Coordinator                                    |                                                                                            |
| Anne M.                           | Holmes     |                       | RN MSN           | Department of Pediatrics, Children's | Kansas City, MO, USA                     | Research Nurse                                          |                                                                                            |
| Kathy                             | Johnson    |                       | RN CCRC          | Department of Pediatrics, Children's | Kansas City, MO, USA                     | Research Nurse                                          |                                                                                            |
| Howard W.                         | Kilbride   |                       | MD               | Department of Pediatrics, Children's | Kansas City, MO, USA                     | Follow-up Principal                                     |                                                                                            |
| Eugenia K.                        | Pallotto   |                       | MD MSCE          | Department of Pediatrics, University | Kansas City, MO, USA                     | Site Investigator                                       |                                                                                            |
| Allison                           | Scott      |                       | RNC-NIC          | Department of Pediatrics, University | Kansas City, MO, USA                     | Research Coordinator                                    |                                                                                            |
| Roopali                           | Bapat      |                       | MD               | Department of Pediatrics,            | Columbus, OH, USA                        | Site Investigator                                       |                                                                                            |
| Thomas                            | Bartman    |                       | MD               | Department of Pediatrics,            | Columbus, OH, USA                        | Site Investigator                                       |                                                                                            |
| Elizabeth                         | Bonachea   |                       | MD               | Department of Pediatrics,            | Columbus, OH, USA                        | Site Investigator                                       |                                                                                            |
| Helen                             | Carey      |                       | PT DHSc          | Department of Pediatrics,            | Columbus, OH, USA                        | Follow-up Examiner                                      |                                                                                            |
| Michelle                          | Chao       |                       | BS               | Department of Pediatrics,            | Columbus, OH, USA                        | Research Coordinator                                    |                                                                                            |
| Louis G.                          | Chicoine   |                       | MD               | Department of Pediatrics,            | Columbus, OH, USA                        | Site Investigator                                       |                                                                                            |
| Bronte                            | Clifford   |                       |                  | Department of Pediatrics,            | Columbus, OH, USA                        | Research Coordinator                                    |                                                                                            |
| Marliese                          | Dion Nist  |                       | BSN              | Department of Pediatrics,            | Columbus, OH, USA                        | Research Nurse                                          |                                                                                            |
| Erin                              | Fearns     |                       |                  | Department of Pediatrics,            | Columbus, OH, USA                        | Research Coordinator                                    |                                                                                            |
| Christine A.                      | Fortney    |                       | PhD RN           | Department of Pediatrics,            | Columbus, OH, USA                        | Research Coordinator                                    |                                                                                            |
| Aubry                             | Fowler     |                       | BS               | Department of Pediatrics,            | Columbus, OH, USA                        | Research Coordinator                                    |                                                                                            |
| Jennifer                          | Fuller     |                       | MS RNC           | Department of Pediatrics,            | Columbus, OH, USA                        | Research Nurse                                          |                                                                                            |
| Jennifer L.                       | Grothouse  |                       | RN BSN           | Department of Pediatrics,            | Columbus, OH, USA                        | Research Nurse                                          |                                                                                            |
| Ish                               | Gulati     |                       | MD               | Department of Pediatrics,            | Columbus, OH, USA                        | Site Investigator                                       |                                                                                            |
| Julie                             | Gutentag   |                       | RN BSN           | Department of Pediatrics,            | Columbus, OH, USA                        | Research Nurse                                          |                                                                                            |
| Cole D.                           | Hague      |                       | MS               | Department of Pediatrics,            | Columbus, OH, USA                        | Research Coordinator                                    |                                                                                            |

## Supplemental Online Content: Nonauthor Collaborators

\*Indicates required information. Only first name, last name, and suffix will appear in PubMed.

| *First Name and Middle Initial(s) | *Last Name     | *Suffix (eg, Jr, III) | Academic Degrees | Institution                          | Location (city, state/province, country) | Role or Contribution, eg, chair, principal investigator | Group (if more than 1 Group listed in the byline) and/or Subgroup (eg, Steering Committee) |
|-----------------------------------|----------------|-----------------------|------------------|--------------------------------------|------------------------------------------|---------------------------------------------------------|--------------------------------------------------------------------------------------------|
| Krista                            | Haines         |                       | MD               | Department of Pediatrics,            | Columbus, OH, USA                        | Site Investigator                                       |                                                                                            |
| Brandon                           | Hart           |                       | MD               | Department of Pediatrics,            | Columbus, OH, USA                        | Site Investigator                                       |                                                                                            |
| Michael                           | Hokenson       |                       | MD               | Department of Pediatrics,            | Columbus, OH, USA                        | Site Investigator                                       |                                                                                            |
| Sudarshan R.                      | Jadcherla      |                       | MD               | Department of Pediatrics,            | Columbus, OH, USA                        | Co-Principal                                            |                                                                                            |
| Marissa E.                        | Jones          |                       | RN MBA           | Department of Pediatrics,            | Columbus, OH, USA                        | Research Nurse                                          |                                                                                            |
| Sarah A.                          | Keim           |                       | PhD MA           | Department of Pediatrics,            | Columbus, OH, USA                        | Follow-up Examiner                                      |                                                                                            |
| Patricia                          | Luzader        |                       | RN               | Department of Pediatrics,            | Columbus, OH, USA                        | Research Coordinator                                    |                                                                                            |
| Nathalie L.                       | Maitre         |                       | MD PhD           | Department of Pediatrics,            | Columbus, OH, USA                        | Follow-up Principal                                     |                                                                                            |
| Sarah                             | McGregor       |                       | BSN RNC          | Department of Pediatrics,            | Columbus, OH, USA                        | Research Nurse                                          |                                                                                            |
| Pamela                            | Moorehead      |                       |                  | Department of Pediatrics,            | Columbus, OH, USA                        | Research Coordinator                                    |                                                                                            |
| Leif D.                           | Nelin          |                       | MD               | Department of Pediatrics,            | Columbus, OH, USA                        | Principal Investigator                                  |                                                                                            |
| Mary Ann                          | Nelin          |                       | MD               | Department of Pediatrics,            | Columbus, OH, USA                        | Site Investigator                                       |                                                                                            |
| Nehal A.                          | Parikh         |                       | DO MS            | Department of Pediatrics,            | Columbus, OH, USA                        | Site Investigator                                       |                                                                                            |
| Elizabeth                         | Rodgers        |                       | BSN              | Department of Pediatrics,            | Columbus, OH, USA                        | Research Nurse                                          |                                                                                            |
| Ruth                              | Seabrook       |                       | MD               | Department of Pediatrics,            | Columbus, OH, USA                        | Site Investigator                                       |                                                                                            |
| Tiffany                           | Sharp          |                       |                  | Department of Pediatrics,            | Columbus, OH, USA                        | Research Coordinator                                    |                                                                                            |
| Edward G.                         | Shepherd       |                       | MD               | Department of Pediatrics,            | Columbus, OH, USA                        | Site Investigator                                       |                                                                                            |
| Jonathan L.                       | Slaughter      |                       | MD MPH           | Department of Pediatrics,            | Columbus, OH, USA                        | Site Investigator                                       |                                                                                            |
| Melanie                           | Stein          |                       | RRT BBA          | Department of Pediatrics,            | Columbus, OH, USA                        | Research Nurse                                          |                                                                                            |
| Rox Ann                           | Sullivan       |                       | RN BSN           | Department of Pediatrics,            | Columbus, OH, USA                        | Research Nurse                                          |                                                                                            |
| Jodi A.                           | Ulloa          |                       | MSN              | Department of Pediatrics,            | Columbus, OH, USA                        | Research Nurse                                          |                                                                                            |
| Jon                               | Wispe          |                       | MD               | Department of Pediatrics,            | Columbus, OH, USA                        | Site Investigator                                       |                                                                                            |
| Tara                              | Wolfe          |                       | BSN              | Department of Pediatrics,            | Columbus, OH, USA                        | Research Nurse                                          |                                                                                            |
| Keith O.                          | Yeates         |                       | PhD              | Department of Pediatrics,            | Columbus, OH, USA                        | Follow-up Principal                                     |                                                                                            |
| Lina                              | Yossef-Salameh |                       | MD               | Department of Pediatrics,            | Columbus, OH, USA                        | Site Investigator                                       |                                                                                            |
| Nahla                             | Zaghoul        |                       | MD               | Department of Pediatrics,            | Columbus, OH, USA                        | Site Investigator                                       |                                                                                            |
| Stephanie                         | Wilson Archer  |                       | MA               | Eunice Kennedy Shriver National      | Bethesda, MD, USA                        | Program Coordinator                                     |                                                                                            |
| Soraya                            | Abbasi         |                       | MD               | Department of Pediatrics, University | Philadelphia, PA, USA                    | Site Investigator                                       |                                                                                            |
| Judy C.                           | Bernbaum       |                       | MD               | Department of Pediatrics, University | Philadelphia, PA, USA                    | Follow-up Examiner                                      |                                                                                            |
| Aasma S.                          | Chaudhary      |                       | BS RRT           | Department of Pediatrics, University | Philadelphia, PA, USA                    | Research Coordinator                                    |                                                                                            |

## Supplemental Online Content: Nonauthor Collaborators

\*Indicates required information. Only first name, last name, and suffix will appear in PubMed.

| *First Name and Middle Initial(s) | *Last Name     | *Suffix (eg, Jr, III) | Academic Degrees | Institution                           | Location (city, state/province, country) | Role or Contribution, eg, chair, principal investigator | Group (if more than 1 Group listed in the byline) and/or Subgroup (eg, Steering Committee) |
|-----------------------------------|----------------|-----------------------|------------------|---------------------------------------|------------------------------------------|---------------------------------------------------------|--------------------------------------------------------------------------------------------|
| Dara M.                           | Cucinotta      |                       | RN               | Department of Pediatrics, University  | Philadelphia, PA, USA                    | Research Coordinator                                    |                                                                                            |
| Sara B.                           | DeMauro        |                       | MD MSCE          | Department of Pediatrics, University  | Philadelphia, PA, USA                    | Site Investigator                                       |                                                                                            |
| Marsha                            | Gerdes         |                       | PhD              | Department of Pediatrics, University  | Philadelphia, PA, USA                    | Follow-up Examiner                                      |                                                                                            |
| Hallam                            | Hurt           |                       | MD               | Department of Pediatrics, University  | Philadelphia, PA, USA                    | Site Investigator                                       |                                                                                            |
| Haresh                            | Kirpalani      |                       | BM MSc           | Department of Pediatrics, University  | Philadelphia, PA, USA                    | Co-Principal                                            |                                                                                            |
| Toni                              | Mancini        |                       | RN BSN           | Department of Pediatrics, University  | Philadelphia, PA, USA                    | Research Coordinator                                    |                                                                                            |
| Barbara                           | Schmidt        |                       | MD MSc           | Department of Pediatrics, University  | Philadelphia, PA, USA                    | Principal Investigator                                  |                                                                                            |
| Kyle                              | Binion         |                       | BS               | University of Rochester School of     | Rochester, NY, USA                       | Research Coordinator                                    |                                                                                            |
| Patrick                           | Conway         |                       |                  | University of Rochester School of     | Rochester, NY, USA                       | Research Coordinator                                    |                                                                                            |
| Osman                             | Farooq         |                       | MD               | University of Rochester School of     | Rochester, NY, USA                       | Site Investigator                                       |                                                                                            |
| Ronnie                            | Guillet        |                       | MD PhD           | University of Rochester School of     | Rochester, NY, USA                       | Co-Principal                                            |                                                                                            |
| Cassandra A.                      | Horihan        |                       | MS               | University of Rochester School of     | Rochester, NY, USA                       | Research Coordinator                                    |                                                                                            |
| Rosemary L.                       | Jensen         |                       |                  | University of Rochester School of     | Rochester, NY, USA                       | Follow-up                                               |                                                                                            |
| Nirupama                          | Laroir         |                       | MD               | University of Rochester School of     | Rochester, NY, USA                       | Study Investigator                                      |                                                                                            |
| Joan                              | Merzbach       |                       | LMSW             | University of Rochester School of     | Rochester, NY, USA                       | Follow-up Examiner                                      |                                                                                            |
| Gary J.                           | Myers          |                       | MD               | University of Rochester School of     | Rochester, NY, USA                       | Follow-up Principal                                     |                                                                                            |
| Premini                           | Sabaratham     |                       | MPH              | University of Rochester School of     | Rochester, NY, USA                       | Site Investigator                                       |                                                                                            |
| Ann Marie                         | Scorsone       |                       | MS CCRC          | University of Rochester School of     | Rochester, NY, USA                       | Research Coordinator                                    |                                                                                            |
| Holly I.M.                        | Wadkins        |                       | MA               | University of Rochester School of     | Rochester, NY, USA                       | Research Coordinator                                    |                                                                                            |
| Kelley                            | Yost           |                       | PhD              | University of Rochester School of     | Rochester, NY, USA                       | Follow-up Examiner                                      |                                                                                            |
| Carla M.                          | Bann           |                       | PhD              | Social, Statistical and Environmental | Research Triangle Park,                  | Statistician                                            |                                                                                            |
| Margaret M.                       | Crawford       |                       | BS CCRP          | Social, Statistical and Environmental | Rockville, MD, USA                       | Research Coordinator                                    |                                                                                            |
| Jenna                             | Gabrio         |                       | MPH CCRP         | Social, Statistical and Environmental | Research Triangle Park,                  | Program Coordinator                                     |                                                                                            |
| Marie G.                          | Gantz          |                       | PhD              | Social, Statistical and Environmental | Research Triangle Park,                  | Statistician                                            |                                                                                            |
| Scott A.                          | McDonald       |                       | BS               | Social, Statistical and Environmental | Research Triangle Park,                  | Statistician                                            |                                                                                            |
| Jamie E.                          | Newman         |                       | PhD MPH          | Social, Statistical and Environmental | Research Triangle Park,                  | Follow-up                                               |                                                                                            |
| Jeanette                          | O'Donnell      |                       | BS               | Social, Statistical and Environmental | Research Triangle Park,                  | Database                                                |                                                                                            |
| Carolyn M.                        | Petrie Huitema |                       | MS CCRP          | Social, Statistical and Environmental | Rockville, MD, USA                       | Research Coordinator                                    |                                                                                            |
| James W.                          | Pickett        |                       | BS               | Social, Statistical and Environmental | Research Triangle Park,                  | Programmer                                              |                                                                                            |
| Annie M.                          | VonLehmden     |                       | BS               | Social, Statistical and Environmental | Research Triangle Park,                  | Database                                                |                                                                                            |

## Supplemental Online Content: Nonauthor Collaborators

\*Indicates required information. Only first name, last name, and suffix will appear in PubMed.

| *First Name and Middle Initial(s) | *Last Name     | *Suffix (eg, Jr, III) | Academic Degrees | Institution                           | Location (city, state/province, country) | Role or Contribution, eg, chair, principal investigator | Group (if more than 1 Group listed in the byline) and/or Subgroup (eg, Steering Committee) |
|-----------------------------------|----------------|-----------------------|------------------|---------------------------------------|------------------------------------------|---------------------------------------------------------|--------------------------------------------------------------------------------------------|
| Dennis                            | Wallace        |                       | PhD              | Social, Statistical and Environmental | Research Triangle Park,                  | Co-Principal                                            |                                                                                            |
| Kristin M.                        | Zaterka-Baxter |                       | RN BSN           | Social, Statistical and Environmental | Research Triangle Park,                  | Research Coordinator                                    |                                                                                            |
| Valerie Y.                        | Chock          |                       | MD MS            | Department of Pediatrics, Division    | Palo Alto, CA, USA                       | Site Investigator                                       |                                                                                            |
| Maria Elena                       | DeAnda         |                       | PhD              | Department of Pediatrics, Division    | Palo Alto, CA, USA                       | Follow-up Examiner                                      |                                                                                            |
| Anne M.                           | DeBattista     |                       | RN PNP-C         | Department of Pediatrics, Division    | Palo Alto, CA, USA                       | Follow-up Examiner                                      |                                                                                            |
| Lynne C.                          | Huffman        |                       | MD               | Department of Pediatrics, Division    | Palo Alto, CA, USA                       | Site Investigator                                       |                                                                                            |
| Casey E.                          | Krueger        |                       | PhD              | Department of Pediatrics, Division    | Palo Alto, CA, USA                       | Follow-up Examiner                                      |                                                                                            |
| Ryan E.                           | Lucash         |                       | PhD              | Department of Pediatrics, Division    | Palo Alto, CA, USA                       | Follow-up Examiner                                      |                                                                                            |
| Melinda S.                        | Proud          |                       | RCP              | Department of Pediatrics, Division    | Palo Alto, CA, USA                       | Research Assistant                                      |                                                                                            |
| David K.                          | Stevenson      |                       | MD               | Department of Pediatrics, Division    | Palo Alto, CA, USA                       | Co-Principal                                            |                                                                                            |
| Heather L.                        | Taylor         |                       | PhD              | Department of Pediatrics, Division    | Palo Alto, CA, USA                       | Follow-up Examiner                                      |                                                                                            |
| Hali E.                           | Weiss          |                       | MD               | Department of Pediatrics, Division    | Palo Alto, CA, USA                       | Laboratory Personnel                                    |                                                                                            |
| Teresa                            | Chanlaw        |                       | MPH              | Department of Pediatrics, University  | Los Angeles, CA, USA                     | Research Coordinator                                    |                                                                                            |
| Uday                              | Devaskar       |                       | MD               | Department of Pediatrics, University  | Los Angeles, CA, USA                     | Principal Investigator                                  |                                                                                            |
| Rachel                            | Geller         |                       | RN BSN           | Department of Pediatrics, University  | Los Angeles, CA, USA                     | Research Coordinator                                    |                                                                                            |
| Isabell B.                        | Purdy          |                       | PNP NNP          | Department of Pediatrics, University  | Los Angeles, CA, USA                     | Follow-up Principal                                     |                                                                                            |
| Sofia                             | Aliaga         |                       | MD MPH           | Division of Neonatal/Perinatal        | Chapel Hill, NC, USA                     | Site Investigator                                       |                                                                                            |
| Janice                            | Bernhardt      |                       | MS RN            | Division of Neonatal/Perinatal        | Chapel Hill, NC, USA                     | Research Coordinator                                    |                                                                                            |
| Carl L.                           | Bose           |                       | MD               | Division of Neonatal/Perinatal        | Chapel Hill, NC, USA                     | Site Investigator                                       |                                                                                            |
| Cynthia L.                        | Clark          |                       | RN               | Division of Neonatal/Perinatal        | Chapel Hill, NC, USA                     | Research Coordinator                                    |                                                                                            |
| Matthew Maxwell                   | Laughon        |                       | MD MPH           | Division of Neonatal/Perinatal        | Chapel Hill, NC, USA                     | Site Investigator                                       |                                                                                            |
| Diane D.                          | Warner         |                       | MD MPH           | Division of Neonatal/Perinatal        | Chapel Hill, NC, USA                     | Follow-up Principal                                     |                                                                                            |
| Janice Kay                        | Wereszczak     |                       | CPNP-            | Division of Neonatal/Perinatal        | Chapel Hill, NC, USA                     | Follow-up Examiner                                      |                                                                                            |
| Conra                             | Backstrom Lacy |                       | RN               | University of New Mexico Health       | Albuquerque, NM, USA                     | Research Coordinator                                    |                                                                                            |
| Andrea F.                         | Duncan         |                       | MD MSc           | University of New Mexico Health       | Albuquerque, NM, USA                     | Follow-up Examiner                                      |                                                                                            |
| Janell                            | Fuller         |                       | MD               | University of New Mexico Health       | Albuquerque, NM, USA                     | Co-Principal                                            |                                                                                            |
| Carol H.                          | Hartenberger   |                       | MPH RN           | University of New Mexico Health       | Albuquerque, NM, USA                     | Research Nurse                                          |                                                                                            |
| Jean R.                           | Lowe           |                       | PhD              | University of New Mexico Health       | Albuquerque, NM, USA                     | Follow-up Examiner                                      |                                                                                            |
| Robin K.                          | Ohls           |                       | MD               | University of New Mexico Health       | Albuquerque, NM, USA                     | Co-Principal                                            |                                                                                            |
| Sandra                            | Sundquist      |                       | MSN RNC-         | University of New Mexico Health       | Albuquerque, NM, USA                     | Research Nurse                                          |                                                                                            |

## Supplemental Online Content: Nonauthor Collaborators

\*Indicates required information. Only first name, last name, and suffix will appear in PubMed.

| *First Name and Middle Initial(s) | *Last Name  | *Suffix (eg, Jr, III) | Academic Degrees | Institution                      | Location (city, state/province, country) | Role or Contribution, eg, chair, principal investigator | Group (if more than 1 Group listed in the byline) and/or Subgroup (eg, Steering Committee) |
|-----------------------------------|-------------|-----------------------|------------------|----------------------------------|------------------------------------------|---------------------------------------------------------|--------------------------------------------------------------------------------------------|
| John                              | Barks       |                       | MD               | Department of Neonatal-Perinatal | Ann Arbor, MI, USA                       | Site Investigator                                       |                                                                                            |
| Mary K.                           | Christensen |                       | BA RRT           | Department of Neonatal-Perinatal | Ann Arbor, MI, USA                       | Research Coordinator                                    |                                                                                            |
| Stephanie A.                      | Wiggins     |                       | MS               | Department of Neonatal-Perinatal | Ann Arbor, MI, USA                       | Research Coordinator                                    |                                                                                            |
| Monika                            | Bajaj       |                       | MD               | Department of Pediatrics, Wayne  | Detroit, MI, USA                         | Site Investigator                                       |                                                                                            |
| Sanjay                            | Chawla      |                       | MD               | Department of Pediatrics, Wayne  | Detroit, MI, USA                         | Co-Principal                                            |                                                                                            |
| Kirsten                           | Childs      |                       | RN BSN           | Department of Pediatrics, Wayne  | Detroit, MI, USA                         | Research Coordinator                                    |                                                                                            |
| Lilia C.                          | De Jesus    |                       | MD               | Department of Pediatrics, Wayne  | Detroit, MI, USA                         | Site Investigator                                       |                                                                                            |
| Eunice                            | Hinz Woldt  |                       | RN MSN           | Department of Pediatrics, Wayne  | Detroit, MI, USA                         | Research Coordinator                                    |                                                                                            |
| Mary E.                           | Johnson     |                       | RN BSN           | Department of Pediatrics, Wayne  | Detroit, MI, USA                         | Research Nurse                                          |                                                                                            |
| Girija                            | Natarajan   |                       | MD               | Department of Pediatrics, Wayne  | Detroit, MI, USA                         | Study Investigator                                      |                                                                                            |
| Bogdan                            | Panaitescu  |                       | MD PhD           | Department of Pediatrics, Wayne  | Detroit, MI, USA                         | Site Investigator                                       |                                                                                            |
| Jeannette E.                      | Prentice    |                       | MD               | Department of Pediatrics, Wayne  | Detroit, MI, USA                         | Site Investigator                                       |                                                                                            |
| Beena G.                          | Sood        |                       | MD MS            | Department of Pediatrics, Wayne  | Detroit, MI, USA                         | Co-Principal                                            |                                                                                            |
